# Supplementary material
Source: ML conference proceedings conference paper supplement (https://proceedings.mlr.press/v216/xu23a.html)
Supplement: Supplementary file 1 [file xu23a-supp.pdf]

---

# Conformal Risk Control for Ordinal Classification (Supplementary Material)

---

Yunpeng Xu<sup>1</sup>

Wenge Guo<sup>\*2</sup>

Zhi Wei<sup>1</sup>

<sup>1</sup>Department of Computer Science, New Jersey Institute of Technology, Newark, New Jersey, 07102, USA

<sup>2</sup>Department of Mathematical Sciences, New Jersey Institute of Technology, Newark, New Jersey, 07102, USA

## A A GENERALIZATION OF THEOREM 2 IN Angelopoulos et al. [2022]

In the Supplementary Material, we will present a generalization of Theorem 2 in Angelopoulos et al. [2022] on the lower bound of conformal risk control, which is needed in the proof of Theorem 1 in our paper. This result itself might be of independent interest to other applications. For convenience, we use the same notations as in Angelopoulos et al. [2022] in the following discussion.

Suppose that  $\mathcal{C}_\lambda : \mathcal{X} \rightarrow 2^{\mathcal{Y}}$  is a given sequence of functions of an input  $X \in \mathcal{X}$  that outputs a prediction set  $\mathcal{C}(X) \subseteq \mathcal{Y}$ , which is indexed by a threshold  $\lambda \in \Lambda$ , and  $\mathcal{L}(Y, \mathcal{C}_\lambda(X)) \in (-\infty, B]$  be a given loss function of any observation  $(X, Y)$  and the corresponding prediction set  $\mathcal{C}_\lambda(X)$ . For the calibration observations  $(X_i, Y_i)_{i=1}^n$  and the test observation  $(X_{n+1}, Y_{n+1})$ , let  $L_i(\lambda) = \mathcal{L}(Y_i, \mathcal{C}_\lambda(X_i))$  for  $i = 1, \dots, n+1$  and  $\hat{R}_n(\lambda) = (L_1(\lambda) + \dots + L_n(\lambda))/n$ . The value of  $\lambda$  is determined according to the following algorithm:

$$\hat{\lambda} = \inf \left\{ \lambda : \frac{n}{n+1} \hat{R}_n(\lambda) + \frac{B}{n+1} \leq \alpha \right\},$$

where  $\alpha \in (0, B)$  is the given desired risk level upper bound. Let  $D = \{\lambda : J(\hat{R}_{n+1}, \lambda) > 0\}$  denote the set of discontinuities in  $\hat{R}_{n+1}$ , where  $J(\mathcal{L}, \lambda)$  is the jump function defined below,

$$J(\mathcal{L}, \lambda) = \lim_{\epsilon \rightarrow 0+} \mathcal{L}(\lambda - \epsilon) - \mathcal{L}(\lambda),$$

which quantifies the size of the discontinuity in the loss function  $\mathcal{L}$  at a point  $\lambda$ . For any  $\lambda \in D$ , define

$$s(\lambda) = |\{i : J(L_i, \lambda) > 0\}|,$$

the number of  $L_i(\lambda)$  which are discontinuous at  $\lambda$ . Regarding  $s(\lambda)$ , we assume that

$$\sup_{\lambda \in \Lambda} s(\lambda) \leq M, \quad \text{almost surely,}$$

where  $M$  is a non-negative integer. Specifically, if  $M = 0$ , this assumption implies that for any  $\lambda$ ,  $P(J(L_i, \lambda) > 0) = 0$  for  $i = 1, \dots, n+1$ , which is the exactly original discontinuity assumption in Theorem 2 of Angelopoulos et al. [2022].

Under the above relaxed assumption, we generalize Theorem 2 in Angelopoulos et al. [2022] as follows. This result is applicable to the ordinal classification setting.

**Theorem 4.** *In the settings of Theorem 1 of Angelopoulos et al. [2022], further assume that  $L_i$  are i.i.d,  $L_i > 0$  and*

$$\sup_{\lambda \in \Lambda} s(\lambda) \leq M, \quad \text{almost surely,}$$

---

<sup>\*</sup>Corresponding author

where  $M$  is a non-negative integer. Then,

$$E[L_{n+1}(\hat{\lambda})] \geq \alpha - \frac{(M+2)B}{n+1}.$$

Specifically, if  $M = 0$ , the above result reduces to Theorem 2 in Angelopoulos et al. [2022]. To show Theorem 4, we need to generalize Lemma 1 of Angelopoulos et al. [2022] as follows and then use the similar arguments as in the proof of Theorem 2 therein along with this lemma.

**Lemma 1.** In the settings of Theorem 4, any jumps in the empirical risk are bounded, i.e.,

$$\sup_{\lambda \in \Lambda} J(\hat{R}_n, \lambda) \leq \frac{(M+1)B}{n}, \quad \text{almost surely.}$$

This lemma can be proved by using the similar arguments as in the proof of Lemma 1 of Angelopoulos et al. [2022].

## References

Anastasios N. Angelopoulos, Stephen Bates, Adam Fisch, Lihua Lei, and Tal Schuster. Conformal risk control. *arXiv:2208.02814*, 2022.
